# Supplementary material
Source: Copernicus journal article supplement (doi:10.5194/hess-30-4157-2026)
Supplement: Supplementary file 2 [file Supporting tables HESS Mar 2026.pdf › Final Manuscript in pdf and word May01/Final Plots/Supporting tables HESS Mar 2026.pdf]

*Supporting Tables for*

**Quantifying the response of water and carbon balances to land cover and climate extremes across Germany.**

Karim Pyarali<sup>1,2\*</sup>, Lulu Zhang<sup>2\*</sup>, Ning Liu<sup>4</sup>, Abdulhakeem Al-Qubati<sup>1,2</sup> and Ge Sun<sup>3\*</sup>

<sup>1</sup>Technische Universität Dresden, Helmholtzstr. 10, 01069, Dresden, Germany.

<sup>2</sup>United Nations University, Institute for Integrated Management of Material Fluxes and of Resources, Ammonstrasse 74, 01067, Dresden, Germany.

<sup>3</sup>Eastern Forest Environmental Threat Assessment Center, Southern Research Station, USDA Forest Service, Research Triangle Park, NC 27709, USA.

<sup>4</sup>CSIRO Environment, Canberra ACT 2601.

\*Corresponding authors: Karim Pyarali ([karim.pyarali@tu-dresden.de](mailto:karim.pyarali@tu-dresden.de)); Lulu Zhang ([lzhang@unu.edu](mailto:lzhang@unu.edu)); Ge Sun ([Ge.Sun@usda.gov](mailto:Ge.Sun@usda.gov))

**Contents of this file**

Tables S1 to S6

**Introduction**

This supporting information provides the tables that supplements the main scientific conclusions of the paper.

Table S1: Regression coefficient parameters for GPP and Re estimated using eddy covariance measurements collected from the works of Zhang et al, (2016) and Sun et al., (2011).

| Land Cover                 | IGBP | GPP parameter (a) | Ecosystem Respiration (Re) parameter |           |
|----------------------------|------|-------------------|--------------------------------------|-----------|
|                            |      |                   | Intercept (m)                        | Slope (n) |
| Urban                      | Urb  | 0                 | 0                                    | 0         |
| Croplands                  | CRO  | 2.533             | 40.6                                 | 0.43      |
| Deciduous Broadleaf Forest | DBF  | 3.28              | 30.8                                 | 0.45      |
| Evergreen Needleleaf       | ENF  | 2.71              | 9.9                                  | 0.68      |
| Mixed Forests              | MF   | 3.349             | 24.4                                 | 0.62      |
| Grasslands                 | GRA  | 2.333             | 18.9                                 | 0.64      |
| Closed Shrublands          | CSH  | 1.734             | 11.4                                 | 0.69      |
| Open Shrublands            | OSH  | 1.679             | 9.7                                  | 0.56      |
| Wetlands                   | WET  | 1.66              | 7.8                                  | 0.56      |
| Water                      | WAT  | 0                 | 0                                    | 0         |

Table S2: Land cover reclassification and share of new classes in German landscape.

| IGBP Description                                         | IGBP Abbreviations | Reclassification | CORINE Class Range | Percentage of Germany (%) |
|----------------------------------------------------------|--------------------|------------------|--------------------|---------------------------|
| Urban                                                    | Urb                | 1                | 111 - 133          | 8.90                      |
| Croplands                                                | CRO                | 2                | 141 - 243          | 57.8                      |
| Deciduous Broadleaf Forests                              | DBF                | 3                | 311                | 10.2                      |
| Evergreen Needleleaf Forests                             | ENF                | 4                | 312                | 16.6                      |
| Mixed Forests                                            | MF.                | 5                | 313                | 3.70                      |
| Grasslands                                               | GRA                | 6                | 321                | 0.40                      |
| Closed Shrubland                                         | CSH                | 7                | 322 - 324          | 0.90                      |
| Open Shrubland                                           | OSH                | 8                | 331 - 335          | 0.04                      |
| Wetlands                                                 | WET                | 9                | 411 - 423          | 0.30                      |
| Water Bodies                                             | WAT                | 10               | 511 - 523          | 1.20                      |
| * CORINE: Coordination of Information on the Environment |                    |                  |                    |                           |
| ** IGBP: International Geosphere-Biosphere Programme     |                    |                  |                    |                           |

Table S3: Monthly resolution model validation results of discharge for 12 representative watersheds across Germany.

| Station Name     | Simulated Watershed ID | Observed Station ID | NSE   | RMSE  | KGE   |
|------------------|------------------------|---------------------|-------|-------|-------|
| Bentfeld         | 302                    | 6335082             | 0.32  | 15.53 | 0.53  |
| Colnrade OP      | 186                    | 6337050             | 0.79  | 6.33  | 0.78  |
| Wasserthaleben   | 357                    | 6340220             | -7.47 | 16.98 | -1.48 |
| Treuchlingen     | 632                    | 6342522             | 0.34  | 10.90 | 0.53  |
| Bad Rotenfels    | 664                    | 6335710             | 0.68  | 32.56 | 0.83  |
| Kirchen-Hausen   | 766                    | 6342980             | 0.69  | 20.12 | 0.83  |
| Treia            | 4                      | 6338800             | 0.64  | 12.68 | 0.76  |
| Goeritzhain      | 429                    | 6340625             | 0.73  | 13.90 | 0.80  |
| Lohmar           | 427                    | 6335048             | 0.76  | 18.69 | 0.79  |
| Kleinbengerstorf | 58                     | 6340070             | 0.00  | 07.09 | 0.20  |
| Schoenach        | 639                    | 6342640             | -0.66 | 10.75 | 0.09  |
| Niedertrebra     | 424                    | 6340320             | 0.03  | 13.35 | 0.47  |

Table S4: Model validation for discharge comparing mean annual values for 12 watersheds across Germany. The validation is performed for a) the entire simulation period, b) dry period with mean annual precipitation less than the 25th percentile, and wet period with mean annual precipitation greater than the 75th percentile. Station names are linked to the same station and watershed ID presented in Table S3.

| Station Name     | Mean Annual runoff |           |            |            | Predicted vs Observed R <sup>2</sup> |                | Dry period (MAP < 25th percentile) |       |       | Wet period (MAP > 75th percentile) |       |       |
|------------------|--------------------|-----------|------------|------------|--------------------------------------|----------------|------------------------------------|-------|-------|------------------------------------|-------|-------|
|                  | Observed           | Predicted | Model bias | Model bias | R <sup>2</sup>                       | R <sup>2</sup> | R <sup>2</sup>                     | RMSE  | Bias  | R <sup>2</sup>                     | RMSE  | Bias  |
|                  | mm                 | mm        | mm         | %          | Annual                               | Monthly        | Monthly                            | mm    | mm    | Monthly                            | mm    | mm    |
| Bentfeld         | 338.72             | 358.37    | 19.66      | 5.80       | 0.82                                 | 0.70           | 0.80                               | 11.70 | -2.69 | 0.55                               | 21.19 | 9.04  |
| Colnrade OP      | 227.99             | 181.63    | -46.36     | -20.33     | 0.93                                 | 0.87           | 0.93                               | 6.42  | -5.07 | 0.86                               | 6.52  | -0.22 |
| Wasserthaleben   | 70.14              | 162.60    | 92.46      | 131.81     | 0.18                                 | 0.30           | 0.62                               | 13.00 | 4.11  | 0.24                               | 23.39 | 14.57 |
| Treuchlingen     | 183.39             | 202.51    | 19.11      | 10.42      | 0.70                                 | 0.70           | 0.80                               | 6.71  | -1.86 | 0.71                               | 14.49 | 7.48  |
| Bad Rotenfels    | 979.44             | 926.96    | -52.48     | -5.36      | 0.85                                 | 0.73           | 0.73                               | 32.49 | -8.82 | 0.76                               | 33.46 | -9.14 |
| Kirchen-Hausen   | 553.40             | 521.76    | -31.65     | -5.72      | 0.88                                 | 0.73           | 0.62                               | 17.61 | -1.01 | 0.77                               | 19.73 | 0.75  |
| Treia            | 439.24             | 352.85    | -86.39     | -19.67     | 0.75                                 | 0.79           | 0.74                               | 12.64 | -8.82 | 0.80                               | 13.14 | -4.86 |
| Goeritzhain      | 412.82             | 345.10    | -67.72     | -16.40     | 0.85                                 | 0.75           | 0.77                               | 8.00  | -3.42 | 0.67                               | 15.35 | -3.24 |
| Lohmar           | 683.65             | 584.69    | -98.96     | -14.48     | 0.91                                 | 0.84           | 0.89                               | 15.81 | -3.99 | 0.83                               | 20.32 | -0.17 |
| Kleinbengerstorf | 152.63             | 158.53    | 5.91       | 3.87       | 0.95                                 | 0.83           | 0.95                               | 6.36  | -0.44 | 0.80                               | 8.58  | 4.63  |
| Schoenach        | 206.31             | 214.90    | 8.59       | 4.17       | 0.63                                 | 0.60           | 0.50                               | 9.92  | -3.66 | 0.72                               | 12.54 | 6.50  |
| Niedertrebra     | 204.75             | 203.89    | -0.86      | -0.42      | 0.55                                 | 0.50           | 0.86                               | 7.31  | -2.94 | 0.39                               | 18.09 | 5.86  |

Table S5: Land cover specific ET validation for WaSSI ET data using corrected and uncorrected eddy flux ET data across thirteen different sites in Germany.

| Eddy Flux Tower   | WS ID | Land cover | Period                    | Uncorrected Observed ET (mm mon <sup>-1</sup> ) |             |                 |                 |        |      | Corrected Observed ET (mm mon <sup>-1</sup> ) |             |                 |                 |        |      |
|-------------------|-------|------------|---------------------------|-------------------------------------------------|-------------|-----------------|-----------------|--------|------|-----------------------------------------------|-------------|-----------------|-----------------|--------|------|
|                   |       |            |                           | R2                                              | Correlation | Obs Annual Mean | Sim Annual Mean | Bias % | KGE  | R2                                            | Correlation | Obs Annual Mean | Sim Annual Mean | Bias % | KGE  |
| Selhausen Juelich | 457   | CRO        | 2011 - 2015               | 0.74                                            | 0.86        | 653.35          | 542.58          | -16.95 | 0.67 | 0.74                                          | 0.87        | 755.82          | 518.88          | -31.35 | 0.53 |
| Klingenberg       | 394   |            | 2004 - 2015               | 0.57                                            | 0.76        | 343.24          | 536.49          | 56.30  | 0.38 | 0.62                                          | 0.79        | 491.34          | 533.62          | 8.60   | 0.63 |
| Gebsee            | 415   |            | 2001 - 2015               | 0.77                                            | 0.88        | 363.54          | 490.24          | 34.85  | 0.58 | 0.75                                          | 0.87        | 415.84          | 490.24          | 17.89  | 0.60 |
| Hainich           | 390   | DBF        | 2001 - 2011               | 0.85                                            | 0.92        | 379.93          | 469.26          | 23.51  | 0.70 | 0.86                                          | 0.93        | 414.78          | 454.79          | 9.65   | 0.70 |
| Leinefelde        | 390   |            | 2002 – 2006 & 2010 - 2013 | 0.81                                            | 0.90        | 397.09          | 500.78          | 26.11  | 0.67 | 0.85                                          | 0.92        | 447.64          | 500.78          | 11.87  | 0.70 |
|                   |       |            |                           |                                                 |             |                 |                 |        |      |                                               |             |                 |                 |        |      |
| Lackenberg        | 631   | ENF        | 2009 - 2015               | 0.64                                            | 0.80        | 494.10          | 608.61          | 23.17  | 0.54 | 0.76                                          | 0.87        | 377.05          | 574.46          | 52.36  | 0.43 |
| Oberbärenburg     | 394   |            | 2008 - 2015               | 0.83                                            | 0.91        | 372.56          | 577.34          | 54.97  | 0.43 | 0.85                                          | 0.92        | 473.79          | 577.34          | 21.86  | 0.72 |
| Tharandt          | 394   |            | 2001 - 2015               | 0.85                                            | 0.92        | 387.96          | 575.36          | 48.31  | 0.46 | 0.90                                          | 0.95        | 463.02          | 575.36          | 24.26  | 0.75 |
| Grillenburg       | 394   | GRA        | 2004 - 2015               | 0.79                                            | 0.89        | 367.44          | 439.02          | 19.48  | 0.68 | 0.80                                          | 0.90        | 615.46          | 427.31          | -30.57 | 0.39 |
| Rollesbroich      | 457   |            | 2011 - 2015               | 0.74                                            | 0.86        | 558.22          | 558.15          | -0.01  | 0.80 | 0.71                                          | 0.85        | 694.15          | 547.05          | -21.19 | 0.65 |
| Schechenfilz Nord | 737   | WET        | 2012 - 2015               | 0.32                                            | 0.58        | 610.97          | 642.85          | 5.22   | 0.53 | 0.11                                          | 0.37        | 868.83          | 635.76          | -26.83 | 0.17 |
| Spreewald         | 269   |            | 2010 - 2014               | 0.74                                            | 0.86        | 432.02          | 524.12          | 21.32  | 0.70 |                                               |             | NA              |                 |        |      |
| Anklam            | 23    |            | 2009 - 2014               | 0.26                                            | 0.54        | 628.52          | 527.12          | -16.13 | 0.39 |                                               |             | NA.             |                 |        |      |

Table S6: Mean annual comparison between WaSSI-ET and  $P - Q_{\text{observed}}$ 

| Station ID       | Period      | Mean Annual   |                      |                      |          |            |            |
|------------------|-------------|---------------|----------------------|----------------------|----------|------------|------------|
|                  |             | Precipitation | PET <sub>hamon</sub> | $P - Q_{\text{obs}}$ | WaSSI-ET | Model bias | Model bias |
|                  |             | mm            | mm                   | mm                   | mm       | mm         | %          |
| Bentfeld         | 2001 - 2016 | 908.56        | 631.57               | 569.84               | 554.45   | -15.39     | -2.7       |
| Colnrade OP      | 2001 - 2015 | 722.75        | 666.29               | 494.76               | 539.25   | 44.49      | 8.99       |
| Wasserthaleben   | 2001 - 2016 | 666.00        | 622.17               | 598.21               | 508.6    | -89.61     | -14.98     |
| Treuchlingen     | 2001 - 2016 | 735.39        | 634.80               | 551.99               | 533.97   | -18.02     | -3.26      |
| Bad Rotenfels    | 2001 - 2016 | 1544.69       | 598.57               | 565.25               | 633.25   | 68.01      | 12.03      |
| Kirchen-Hausen   | 2001 - 2008 | 1127.43       | 571.81               | 574.03               | 566.28   | -7.75      | -1.35      |
| Treia            | 2001 - 2016 | 901.89        | 635.48               | 462.66               | 564.34   | 101.68     | 21.98      |
| Goeritzhain      | 2001 - 2015 | 868.60        | 629.38               | 455.79               | 516.94   | 61.15      | 13.42      |
| Lohmar           | 2001 - 2011 | 1193.33       | 619.96               | 540.98               | 583.38   | 42.4       | 7.84       |
| Kleinbengerstorf | 2001 - 2012 | 691.67        | 645.23               | 542.51               | 532.74   | -9.77      | -1.8       |
| Schoenach        | 2001 - 2016 | 768.07        | 643.80               | 561.76               | 551.53   | -10.24     | -1.82      |
| Niedertrebra     | 2001 - 2016 | 720.57        | 620.55               | 521.22               | 516.47   | -4.75      | -0.91      |
