# Supplementary material
Source: Copernicus journal article supplement (doi:10.5194/hess-30-4157-2026)
Supplement: Supplementary file [file hess-30-4157-2026-supplement-title-page.pdf › hess-30-4157-2026-supplement-title-page.pdf]

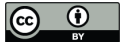

## *Supplement of*

# **Quantifying the response of water and carbon balances to land cover and climate extremes across Germany**

**Karim Pyarali et al.**

*Correspondence to:* Karim Pyarali (karim.pyarali@tu-dresden.de), Lulu Zhang (lzhang@unu.edu), and Ge Sun (ge.sun@usda.gov)

- hess-30-4157-2026-supplement-title-page.pdf
- Final Manuscript in pdf and word May01
  - Final Plots
    - \* Individual Supporting Figures
    - \* Supporting figures HESS Mar 2026.pdf
    - \* Supporting tables HESS Mar 2026.pdf

The copyright of individual parts of the supplement might differ from the article licence.
